# Supplementary material
Source: Springer Nature journal article supplement (https://www.springermedizin.de/resource/supplementary/12889_2010_3347_MOESM1_ESM.pdf/9488820)
Supplement: MOESM1 [file 9488820]

# Quantitative data collection

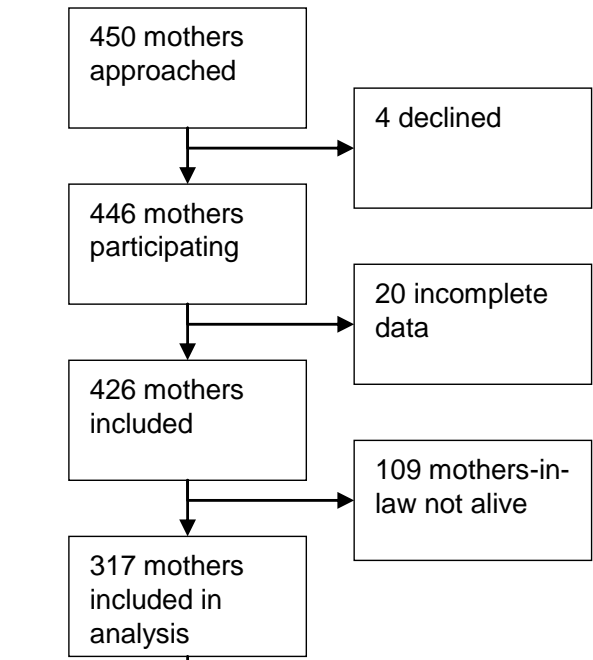

**Quantitative data analysis:**  
descriptive statistics,  
chi square

# Qualitative data collection

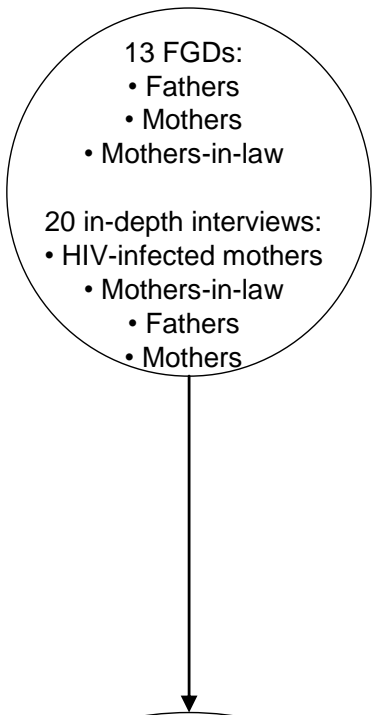

**Qualitative data analysis:**  
thematic content  
analysis

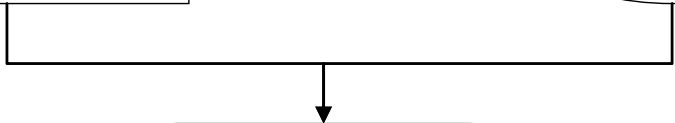

**Combined data interpretation:**  
cross-validation and  
complementarity
